# Supplementary material for: Transcranial optical vascular imaging (TOVI) of cortical hemodynamics in mouse brain
Source: PubMed Central journal article supplement — Sci Rep. 2014 Jul 25;4:5839. doi: 10.1038/srep05839 (PMC5394480; doi:10.1038/srep05839), 2014-07-25
Supplement: srep05839-s1.pdf [file srep05839-s1.pdf]

# **Transcranial optical vascular imaging (TOVI) of cortical hemodynamics in mouse brain**

Vyacheslav Kalchenko<sup>1†</sup>, David Israeli<sup>2†</sup>, Yuri Kuznetsov<sup>1</sup> and Alon Harmelin<sup>1\*</sup>

<sup>1</sup>Department of Veterinary Resources, Weizmann Institute of Science, Rehovot, Israel

<sup>2</sup>Department of Veterinary Resources, Weizmann Institute of Science, Rehovot, Israel and  
Jerusalem Center for Mental Health, affiliated with the Hebrew University, Jerusalem, Israel

## **Supplementary Figure Legends**

**Supplementary Figure 1. Examples of raw and enhanced laser speckle images. (a,b)** Raw LS images of the brain cortex of an untreated control mouse (a) and of a mouse with occlusion of the middle cerebral artery (MCAO). **(c,d)** Enhanced LS images of control (c) and MCAO (d) mice. Scale bars, 1 mm.

**Supplementary Figure 2. The generation of FMIP images.** Flowchart of the computation of filtered MIP image from a stack of raw DF images.

**Supplementary Figure 3. The generation of HUE maps.** Flowchart of the computation of HUE map from filtered subtracted DF images.

**Supplementary Figure 4. The generation of IHS and RGB images.** Flowchart of the computation of IHS and RGB images from FMIP and HUE map images.

**Supplementary Figure 5. The generation of IHS and RGB images.** Flowchart of the computation of IHS and RGB images from LS and FMIP images.

**Supplementary Figure 6.** The pathology seen in the mice following the induced “acute ischemic event ” by carotid ligation, (In serial sections of the brains): There is only one area, in the subarachnoid space with notable pathology. As shown in the figure there is a fibrin thrombus within the cerebral vein at the base of the frontal lobe. There is some hemorrhage at the base of the brain which is most pronounced in the area with the fibrin clump.

## **Supplementary Movies**

### **Supplementary Movie 1**

Real-time video sequence of dynamic fluorescence images showing cortical blood flow in an untreated control mouse. The images were taken during a 20 seconds interval after fluorescein administration into the tail vein. The movie is played back at the same frame rate at which the images were taken.

### **Supplementary Movie 2**

Real-time video sequence of dynamic fluorescence images showing cortical blood flow following occlusion of the middle cerebral artery (MCAO). The images were taken during a 20 seconds interval after fluorescein administration into the tail vein. The movie is played back at the same frame rate at which the images were taken.

**Supplementary Figure S1**

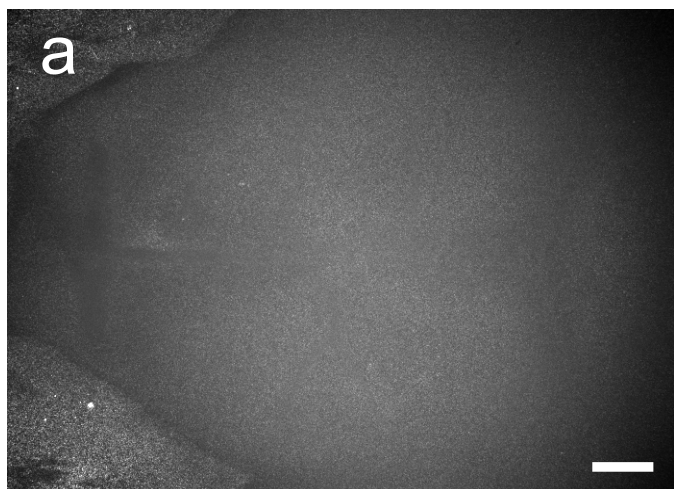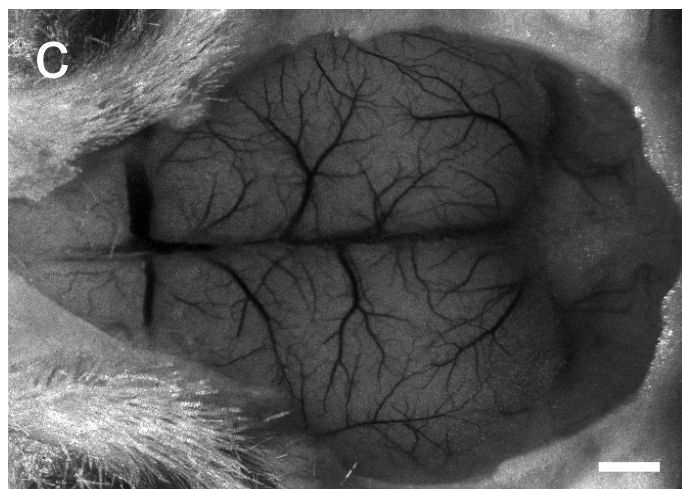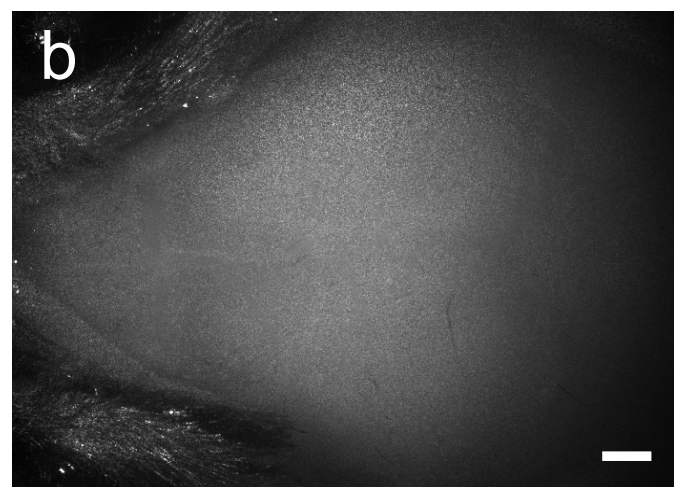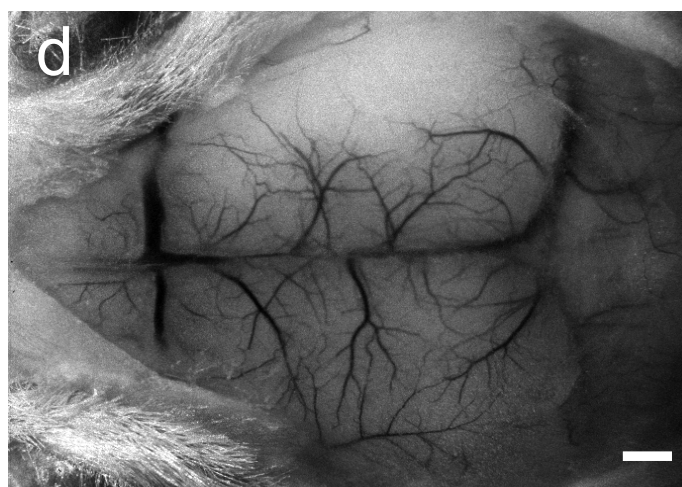

## Supplementary Figure S2

1. Fiji: Process/Filters/ Gaussian Blur/Sigma (Radius) 5
2. Fiji: Process/Image Calculator/(Raw DF) subtract (Blurred DF)

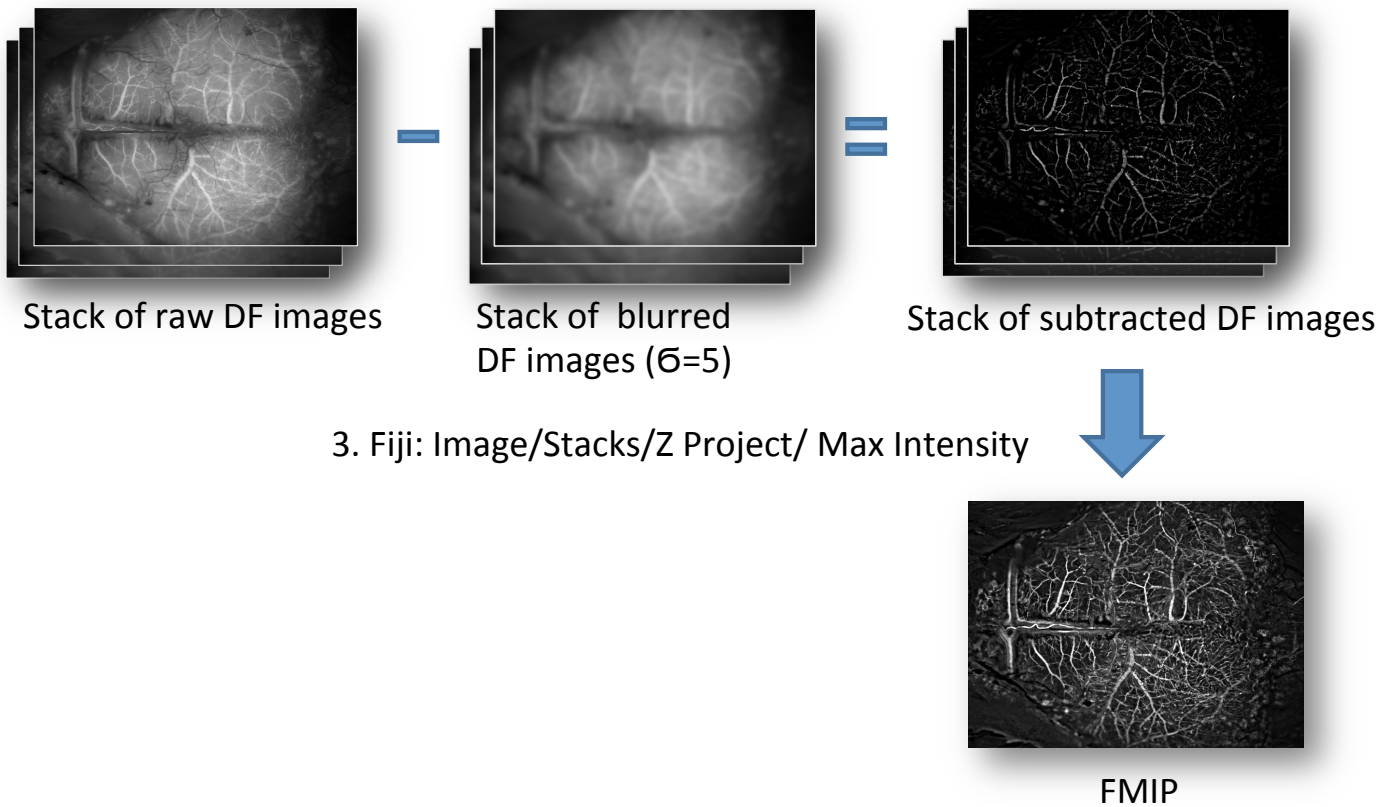

## Supplementary Figure S3

Fiji: Process/Filters/ Gaussian Blur 3D/X,Y sigma (0), Z sigma (3)

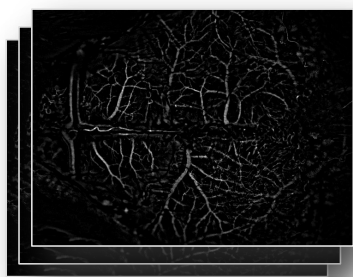

Subtracted DF images

Temporal Gaussian blurring

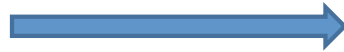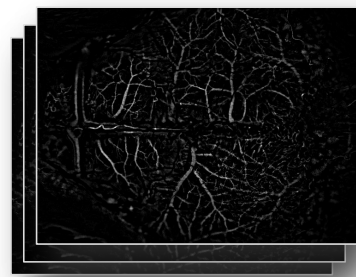

Temporal filtered (blurred) subtracted DF images

Fiji: Plugins/DF/open file (Filtered subtracted DF images)

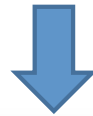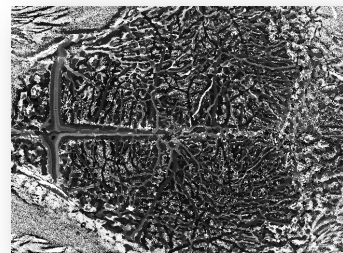

HUE map

## Supplementary Figure S4

1. Fiji: Image/Color/Merge channels/  
C1(red) – FMIP, C2(green) – HUE map, C3(blue) – FMIP

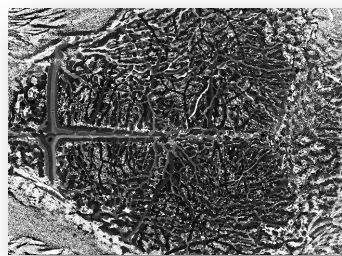

HUE map

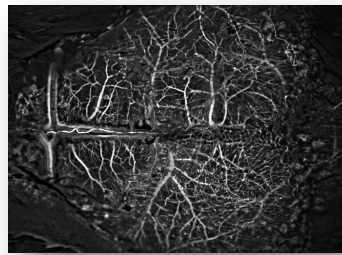

FMIP

2. Fiji: PPlugins/IHSColorTransforms/IHS to RGB

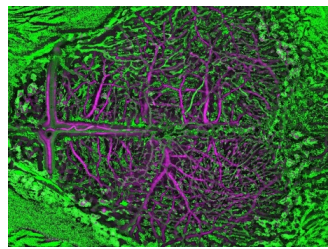

Merged IHS image

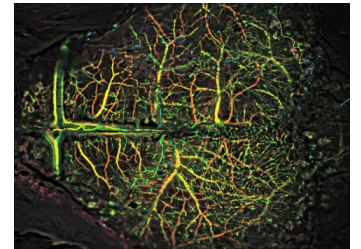

Transformed  
IHS to RGB image

## Supplementary Figure S5

1. Fiji: Image/Color/Merge channels/  
C1(red) – FMIP, C2(green) – LS, C3(blue) – FMIP

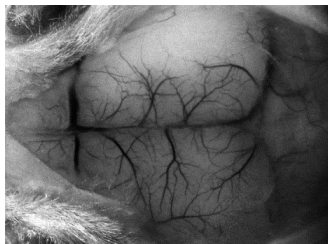

LS

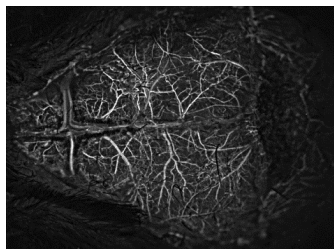

FMIP

2. Fiji: Plugins/Align RGB Planes

3. Fiji: PLugins/IHSColorTransforms/IHS to RGB

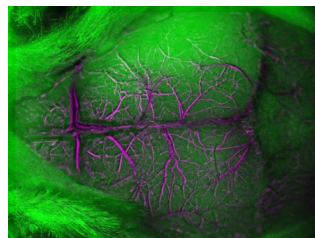

Merged IHS image

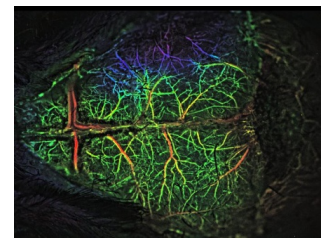

Transformed  
IHS to RGB image



## Supplementary Figure S6

Subarachnoid space  
fibrin Thrombus  
with hemorrhage  
within a vein at the  
base of the frontal  
lobe.

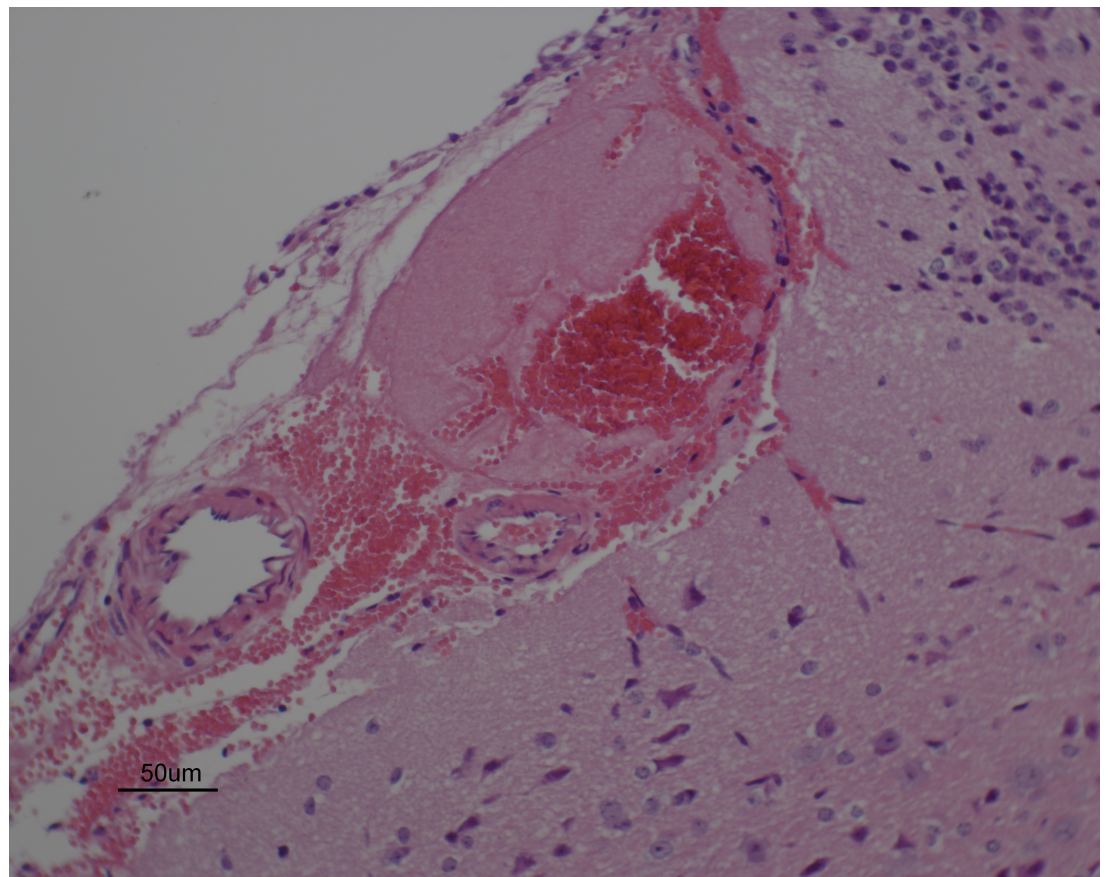



## Supplementary Note 1

### Macro for Fiji for computation of LS image from raw LS image stack.

```
//*****  
// LS Plugin v1.04 Feb 2014  
// Laser Speckle Imaging  
// Integration = 10 frames  
// Vyacheslav (Slava) Kalchenko, MD, PhD, FRMS  
// In Vivo Optical Imaging Unit  
// Department of Veterinary Resources  
// Weizmann Institute of Science  
// email: a.kalchenko@weizmann.ac.il  
//*****  
  
name = getTitle;  
Raw=getImageID();  
  
setBatchMode(true);  
  
run("Grouped Z Project...", "projection=[Standard Deviation] group=10");  
Sd=getImageID();  
  
selectImage(Raw);  
run("Grouped Z Project...", "projection=[Average Intensity] group=10");  
Mean=getImageID();  
selectImage(Raw);  
close();  
  
imageCalculator("Divide create 32-bit stack", Sd, Mean);//  
Rstack=getImageID();  
selectImage(Rstack);  
run("Z Project...", "start=1 stop=1000 projection=[Average Intensity]");  
Result1=getImageID();  
selectImage(Rstack);  
close();  
selectImage(Mean);  
close();  
selectImage(Sd);  
close();  
selectImage(Result1);  
rename ("LSI" + "_" + name);  
setBatchMode(false);
```

## Supplementary Note 2

### Macro for Fiji for computation of HUE map image from enhanced subtracted DF image stack.

```
//----- Prototype-----  
  
//TCM Time Color Mapping - FAST 11.11.13  
  
//Part of "TOVI Project"  
  
//Currently this programm produces HUE map for IHS or HSV color space  
  
//hue = (index of the image of the maximum value for the pixel)/(images per hue cycle)  
  
//Author: Vyacheslav (Slava) Kalchenko, MD, PhD, FRMS  
  
// In Vivo Optical Imaging Unit  
  
// Department of Veterinary Resources  
  
// Weizmann Institute of Science  
  
// email: a.kalchenko@weizmann.ac.il  
  
setBatchMode(true);  
  
path = File.openDialog("Select a File");  
  
open(path);  
  
scr=getImageID();  
  
Stack.getStatistics(voxelCount, mean, min, max, stdDev);  
  
run("32-bit");  
  
run("Divide...", "value="+max);  
  
y=getHeight();  
  
x=getWidth();  
  
newImage("hue", "32-bit black", x, y, 1);  
  
hue=getImageID();//New image for Hue  
  
progress=0;
```

```

step=1/(x*y);
for(j=0;j<y;j++) {
    for (i=0;i<x;i++) {
        progress=progress+step;
        showProgress(progress);
// _____ find HUE value <h> _____
map=0;
h=0; //first Hue parameter
selectImage(scr);
for(s=1;s<nSlices;s++){
    setSlice(s);
    ps=getPixel(i,j); // _____ current pixel
    if (map==ps){h=s;} // index of maximal value <<h>>
        if (map<ps){map=ps;} // find maximum
    }
// _____ end find HUE value <h> _____

hn=(h/nSlices); //----< hn >----- normalisation on number of frames
selectImage(hue);
setPixel(i,j,hn);
    }
}
setBatchMode(false);

```
